# Supplementary material for: Distribution Patterns of Gymnosperm Species along Elevations on the Qinghai–Tibet Plateau: Effects of Climatic Seasonality, Energy–Water, and Physical Tolerance Variables
Source: MDPI journal article supplement (doi:10.3390/plants12234066), 2023-12-04
Supplement: s1 [file s1]

# **Distribution patterns of gymnosperm species along elevations on the Qinghai–Tibet Plateau: Effects of climatic seasonality, energy–water, and physical tolerance variables**

**Muhammad Umair<sup>1,2\*</sup>, Xiaofei Hu<sup>1</sup>, Qi Cheng<sup>1</sup>, Shahzad Ali<sup>1</sup>, Jian Ni<sup>1\*</sup>**

<sup>1</sup>College of Life Sciences, Zhejiang Normal University, Jinhua 321004, China

<sup>2</sup>School of Agriculture and Biology, Shanghai Jiao Tong University, Shanghai 200240, China

Correspondence: [umairm@zjnu.edu.cn](mailto:umairm@zjnu.edu.cn); [nijian@zjnu.edu.cn](mailto:nijian@zjnu.edu.cn)

**Table S1.** Native distribution range of selected gymnosperm species.

| Sr. No. | Species name                                       | Native distribution                                                                                                                                                                                                                                                                                                                                                                                                                                                                                                                                                                                                                                                                                                             |
|---------|----------------------------------------------------|---------------------------------------------------------------------------------------------------------------------------------------------------------------------------------------------------------------------------------------------------------------------------------------------------------------------------------------------------------------------------------------------------------------------------------------------------------------------------------------------------------------------------------------------------------------------------------------------------------------------------------------------------------------------------------------------------------------------------------|
| 1       | <i>Cupressus gigantea</i>                          | China South-Central, Tibet                                                                                                                                                                                                                                                                                                                                                                                                                                                                                                                                                                                                                                                                                                      |
| 2       | <i>Cupressus torulosa</i>                          | Nepal, Pakistan, Tibet, West Himalaya                                                                                                                                                                                                                                                                                                                                                                                                                                                                                                                                                                                                                                                                                           |
| 3       | <i>Juniperus formosana</i>                         | China Southeast, Qinghai, Tibet, Taiwan                                                                                                                                                                                                                                                                                                                                                                                                                                                                                                                                                                                                                                                                                         |
| 4       | <i>Juniperus recurva</i>                           | Assam, China South-Central, East Himalaya, Myanmar, Nepal, Qinghai, Tibet, West Himalaya                                                                                                                                                                                                                                                                                                                                                                                                                                                                                                                                                                                                                                        |
| 5       | <i>Juniperus rigida</i>                            | China North-Central, Inner Mongolia, Japan, Korea, Manchuria, Nansei-shoto, Primorye, Qinghai, Sakhalin                                                                                                                                                                                                                                                                                                                                                                                                                                                                                                                                                                                                                         |
| 6       | <i>Juniperus communis</i><br><i>var. saxatilis</i> | Afghanistan, Albania, Altay, Amur, British Columbia, Bulgaria, Buryatiya, California, Chita, Corse, Cyprus, Czechoslovakia, East Aegean Is., East European Russia, Finland, France, Føroyar, Germany, Greece, Greenland, Iceland, Inner Mongolia, Iran, Iraq, Irkutsk, Italy, Japan, Kamchatka, Kazakhstan, Khabarovsk, Kirgizstan, Korea, Krasnoyarsk, Kuril Is., Lebanon-Syria, Magadan, Manchuria, Mongolia, Nepal, North Caucasus, Norway, Nova Scotia, Oregon, Pakistan, Poland, Primorye, Romania, Sakhalin, Spain, Sweden, Switzerland, Tadzhikistan, Transcaucasus, Turkey, Turkey-in-Europe, Turkmenistan, Tuva, Ukraine, Uzbekistan, Washington, West Himalaya, West Siberia, Xinjiang, Yakutskiya, Yugoslavia, Yukon |
| 7       | <i>Platycladus orientalis</i>                      | Amur, China North-Central, China Southeast, Qinghai, Tibet, Khabarovsk, Korea                                                                                                                                                                                                                                                                                                                                                                                                                                                                                                                                                                                                                                                   |
| 8       | <i>Juniperus chinensis</i>                         | China North-Central, China South-Central, China Southeast, Qinghai, Tibet, Inner Mongolia, Japan, Khabarovsk, Korea, Kuril Is., Manchuria, Myanmar, Primorye, Sakhalin, Taiwan                                                                                                                                                                                                                                                                                                                                                                                                                                                                                                                                                  |
| 9       | <i>Juniperus convallium</i>                        | China North-Central, China South-Central, Qinghai, Tibet                                                                                                                                                                                                                                                                                                                                                                                                                                                                                                                                                                                                                                                                        |
| 10      | <i>Juniperus komarovii</i>                         | China North-Central, China South-Central, Qinghai                                                                                                                                                                                                                                                                                                                                                                                                                                                                                                                                                                                                                                                                               |
| 11      | <i>Juniperus microsperma</i>                       | China South-Central, Qinghai, Tibet                                                                                                                                                                                                                                                                                                                                                                                                                                                                                                                                                                                                                                                                                             |
| 12      | <i>Juniperus pingii</i> <i>var. wilsonii</i>       | China North-Central, China South-Central, Qinghai, Tibet                                                                                                                                                                                                                                                                                                                                                                                                                                                                                                                                                                                                                                                                        |
| 13      | <i>Juniperus przewalskii</i>                       | China North-Central, China South-Central, Inner Mongolia, Qinghai                                                                                                                                                                                                                                                                                                                                                                                                                                                                                                                                                                                                                                                               |
| 14      | <i>Juniperus saltuaria</i>                         | China North-Central, China South-Central, Qinghai, Tibet                                                                                                                                                                                                                                                                                                                                                                                                                                                                                                                                                                                                                                                                        |
| 15      | <i>Juniperus squamata</i>                          | Afghanistan, Assam, China North-Central, China South-Central, China Southeast, East Himalaya, Myanmar, Nepal, Pakistan, Qinghai, Tibet, West Himalaya                                                                                                                                                                                                                                                                                                                                                                                                                                                                                                                                                                           |
| 16      | <i>Juniperus tibetica</i>                          | China North-Central, China South-Central, Qinghai, Tibet                                                                                                                                                                                                                                                                                                                                                                                                                                                                                                                                                                                                                                                                        |
| 17      | <i>Juniperus sabina</i>                            | Albania, Algeria, Altay, Amur, Austria, Bulgaria, China North-Central, Chita, Czechoslovakia, East European Russia, France, Germany, Greece, Inner Mongolia, Italy, Kazakhstan, Khabarovsk, Kirgizstan, Korea, Krym, Manchuria, Mongolia, North Caucasus, Poland, Primorye, Qinghai, Tibet, South European Russia, Spain, Switzerland, Tadzhikistan, Transcaucasus, Turkey, Tuva, Ukraine, West Siberia, Xinjiang, Yugoslavia                                                                                                                                                                                                                                                                                                   |
| 18      | <i>Juniperus indica</i>                            | China South-Central, East Himalaya, Nepal, Pakistan, Tibet, West Himalaya                                                                                                                                                                                                                                                                                                                                                                                                                                                                                                                                                                                                                                                       |

|    |                                                |                                                                                                                                                                                                       |
|----|------------------------------------------------|-------------------------------------------------------------------------------------------------------------------------------------------------------------------------------------------------------|
| 19 | <i>Ephedra equisetina</i>                      | Altay, China North-Central, Inner Mongolia, Kirgizstan, Krasnoyarsk, Mongolia, North Caucasus, Primorye, Qinghai, Tadzhikistan, Turkey, Turkmenistan, Tuva, Uzbekistan, West Siberia, Xinjiang        |
| 20 | <i>Ephedra gerardiana</i>                      | Afghanistan, Altay, East Himalaya, Nepal, Pakistan, Qinghai, Tadzhikistan, Tibet, Tuva, West Himalaya, Xinjiang                                                                                       |
| 21 | <i>Ephedra intermedia</i>                      | Afghanistan, Altay, Inner Mongolia, Iran, Kazakhstan, Kirgizstan, Mongolia, Pakistan, Tadzhikistan, Qinghai, Tibet, Transcaucasus, Turkmenistan, Uzbekistan, West Himalaya, West Siberia, Xinjiang    |
| 22 | <i>Ephedra likiangensis</i>                    | China South-Central, Tibet                                                                                                                                                                            |
| 23 | <i>Ephedra saxatilis</i>                       | China South-Central, East Himalaya, Nepal, Tibet                                                                                                                                                      |
| 24 | <i>Ephedra minuta</i>                          | China South-Central, Qinghai, Tajikistan                                                                                                                                                              |
| 25 | <i>Ephedra monosperma</i>                      | Buryatiya, China North-Central, China South-Central, Chita, Inner Mongolia, Irkutsk, Krasnoyarsk, Mongolia, Primorye, Qinghai, Tibet, Tuva, Xinjiang, Yakutskiya                                      |
| 26 | <i>Ephedra przewalskii</i>                     | China North-Central, Inner Mongolia, Kazakhstan, Kirgizstan, Mongolia, Pakistan, Qinghai, Tadzhikistan, Uzbekistan, Xinjiang                                                                          |
| 27 | <i>Ephedra sinica</i>                          | Buryatiya, China North-Central, Qinghai Chita, Inner Mongolia, Manchuria, Mongolia, Primorye                                                                                                          |
| 28 | <i>Ginkgo biloba</i>                           | China Southeast, Qinghai                                                                                                                                                                              |
| 29 | <i>Gnetum pendulum</i>                         | China South-Central, China Southeast, Tibet                                                                                                                                                           |
| 30 | <i>Abies chayuenensis</i>                      | China South-Central, Tibet                                                                                                                                                                            |
| 31 | <i>Abies delavayi</i> var. <i>delavayi</i>     | China South-Central, East Himalaya, Myanmar, Tibet, Vietnam                                                                                                                                           |
| 32 | <i>Abies delavayi</i> var. <i>motuoensis</i>   | Tibet                                                                                                                                                                                                 |
| 33 | <i>Abies densa</i>                             | Assam, East Himalaya, Nepal, Tibet                                                                                                                                                                    |
| 34 | <i>Abies ernestii</i>                          | China North-Central, China South-Central, Qinghai, Tibet                                                                                                                                              |
| 35 | <i>Abies ernestii</i> var. <i>salouenensis</i> | China South-Central, East Himalaya, Tibet                                                                                                                                                             |
| 36 | <i>Abies fargesii</i>                          | China North-Central, China South-Central, Qinghai                                                                                                                                                     |
| 37 | <i>Abies fargesii</i> var. <i>faxoniana</i>    | China South-Central, Qinghai                                                                                                                                                                          |
| 38 | <i>Abies forrestii</i>                         | China South-Central, Tibet                                                                                                                                                                            |
| 39 | <i>Abies georgei</i>                           | China South-Central, Tibet                                                                                                                                                                            |
| 40 | <i>Abies georgei</i> var. <i>smithii</i>       | China South-Central, Tibet                                                                                                                                                                            |
| 41 | <i>Abies spectabilis</i>                       | Afghanistan, Nepal, Pakistan, Tibet, West Himalaya                                                                                                                                                    |
| 42 | <i>Abies squamata</i>                          | China North-Central, China South-Central, Qinghai, Tibet                                                                                                                                              |
| 43 | <i>Larix gmelinii</i>                          | Amur, Buryatiya, China North-Central, China Southeast, Qinghai, Chita, Inner Mongolia, Irkutsk, Kamchatka, Khabarovsk, Korea, Kuril Is., Magadan, Manchuria, Mongolia, Primorye, Sakhalin, Yakutskiya |
| 44 | <i>Larix griffithii</i>                        | China South-Central, East Himalaya, Nepal, Tibet                                                                                                                                                      |
| 45 | <i>Larix himalaica</i>                         | Nepal, Tibet                                                                                                                                                                                          |
| 46 | <i>Larix kaempferi</i>                         | Qinghai, Japan                                                                                                                                                                                        |
| 47 | <i>Larix olgensis</i>                          | Qinghai, Korea, Manchuria, Primorye                                                                                                                                                                   |
| 48 | <i>Larix potaninii</i>                         | China North-Central, China South-Central, Nepal, Qinghai, Tibet                                                                                                                                       |

|    |                                |                                                                                                                                     |
|----|--------------------------------|-------------------------------------------------------------------------------------------------------------------------------------|
|    | <i>Larix potaninii</i> var.    |                                                                                                                                     |
| 49 | <i>australis</i>               | China North-Central, China South-Central, Tibet                                                                                     |
|    | <i>Larix gmelinii</i> var.     |                                                                                                                                     |
| 50 | <i>principis-rupprechtii</i>   | China North-Central, China Southeast, Inner Mongolia, Qinghai                                                                       |
| 51 | <i>Larix speciosa</i>          | China South-Central, Tibet                                                                                                          |
| 52 | <i>Picea brachytyla</i>        | China North-Central, China South-Central                                                                                            |
|    | <i>Picea brachytyla</i> var.   |                                                                                                                                     |
| 53 | <i>complanata</i>              | Tibet, China Southwest                                                                                                              |
| 54 | <i>Picea crassifolia</i>       | China North-Central, Inner Mongolia, Qinghai                                                                                        |
|    | <i>Picea likiangensis</i> var. |                                                                                                                                     |
| 55 | <i>rubescens</i>               | China South-Central, Qinghai, Tibet                                                                                                 |
|    | <i>Picea likiangensis</i> var. |                                                                                                                                     |
| 56 | <i>hirtella</i>                | China South-Central, Tibet                                                                                                          |
|    | <i>Picea likiangensis</i> var. |                                                                                                                                     |
| 57 | <i>linzhiensis</i>             | China South-Central, Tibet                                                                                                          |
| 58 | <i>Picea purpurea</i>          | China North-Central, China South-Central, Qinghai                                                                                   |
| 59 | <i>Picea asperata</i>          | China North-Central, China South-Central, Inner Mongolia, Qinghai                                                                   |
| 60 | <i>Picea schrenkiana</i>       | Kazakhstan, Kirgizstan, Xinjiang, Tibet                                                                                             |
| 61 | <i>Picea smithiana</i>         | Afghanistan, Nepal, Pakistan, Tibet, West Himalaya                                                                                  |
| 62 | <i>Picea spinulosa</i>         | East Himalaya, Tibet                                                                                                                |
| 63 | <i>Picea wilsonii</i>          | China North-Central, China South-Central, Inner Mongolia, Qinghai                                                                   |
| 64 | <i>Pinus armandii</i>          | China North-Central, China South-Central, China Southeast, Hainan, Inner Mongolia, Myanmar, Taiwan, Tibet                           |
| 65 | <i>Pinus bhutanica</i>         | China South-Central, East Himalaya, Tibet                                                                                           |
| 66 | <i>Pinus densata</i>           | China South-Central, Tibet                                                                                                          |
| 67 | <i>Pinus gerardiana</i>        | Afghanistan, Pakistan, Tibet, West Himalaya                                                                                         |
| 68 | <i>Pinus wallichiana</i>       | Afghanistan, China South-Central, East Himalaya, Nepal, Pakistan, Tibet, West Himalaya                                              |
| 69 | <i>Pinus roxburghii</i>        | Bangladesh, East Himalaya, India, Nepal, Pakistan, West Himalaya, Tibet                                                             |
|    | <i>Pinus sylvestris</i> var.   |                                                                                                                                     |
| 70 | <i>mongolica</i>               | Buryatiya, Chita, Inner Mongolia, Irkutsk, Manchuria, Mongolia                                                                      |
| 71 | <i>Pinus tabuliformis</i>      | China North-Central, China South-Central, China Southeast, Inner Mongolia, Korea, Manchuria, Qinghai                                |
| 72 | <i>Pinus yunnanensis</i>       | China South-Central, China Southeast, Tibet                                                                                         |
| 73 | <i>Pseudotsuga forrestii</i>   | China North-Central, China South-Central, China Southeast, Tibet, Taiwan                                                            |
| 74 | <i>Tsuga dumosa</i>            | China South-Central, East Himalaya, Myanmar, Nepal, Tibet, West Himalaya                                                            |
| 75 | <i>Podocarpus neriifolius</i>  | Andaman Is., Assam, Bangladesh, Borneo, Cambodia, Malaya, Myanmar, Tibet, Nepal, Philippines, Sulawesi, Sumatera, Thailand, Vietnam |
| 76 | <i>Cephalotaxus mannii</i>     | Assam, China South-Central, China Southeast, East Himalaya, Laos, Myanmar, Thailand, Tibet, Vietnam                                 |
| 77 | <i>Amentotaxus argotaenia</i>  | Cambodia, China North-Central, China South-Central, China Southeast, Laos, Tibet, Vietnam                                           |
| 78 | <i>Amentotaxus assamica</i>    | East Himalaya, Tibet                                                                                                                |

---

|    |                          |                                                                                                              |
|----|--------------------------|--------------------------------------------------------------------------------------------------------------|
| 79 | <i>Taxus wallichiana</i> | China South-Central, East Himalaya, Laos, Myanmar, Nepal,<br>Philippines, Sulawesi, Sumatera, Tibet, Vietnam |
|----|--------------------------|--------------------------------------------------------------------------------------------------------------|

---

**Table S2.** Pearson correlation coefficient shows the correlation between climatic conditions, and species richness.

|           | Elevation | SR    | GDD5   | GDD0   | MAT   | MI    | DI    | GP    | MAP   | SS%   | Tmax  | Tmin  | MTCO   | MTWA   | PDM   | PWM    | TAR  | MDT  | PS   | TS   |
|-----------|-----------|-------|--------|--------|-------|-------|-------|-------|-------|-------|-------|-------|--------|--------|-------|--------|------|------|------|------|
| Elevation |           | 0.042 | 0.000  | 0.000  | 0.000 | 0.003 | 0.410 | 0.000 | 0.000 | 0.000 | 0.000 | 0.000 | 0.000  | 0.000  | 0.000 | 0.365  | 0.00 | 0.00 | 0.00 | 0.00 |
| SR        | 0.281     |       | 0.001  | 0.005  | 0.064 | 0.000 | 0.000 | 0.146 | 0.209 | 0.279 | 0.012 | 0.542 | 0.219  | 0.015  | 0.120 | 0.000  | 0.00 | 0.88 | 0.00 | 0.00 |
| GDD5      | -0.977    | 0.451 |        | 0.000  | 0.000 | 0.099 | 0.637 | 0.000 | 0.000 | 0.000 | 0.000 | 0.000 | 0.000  | 0.000  | 0.000 | 0.713  | 0.00 | 0.00 | 0.00 | 0.00 |
| GDD0      | -0.993    | 0.380 | 0.995  |        | 0.000 | 0.022 | 0.892 | 0.000 | 0.000 | 0.000 | 0.000 | 0.000 | 0.000  | 0.000  | 0.000 | 0.825  | 0.00 | 0.00 | 0.00 | 0.00 |
| MAT       | -0.997    | 0.256 | 0.973  | 0.989  |       | 0.003 | 0.403 | 0.000 | 0.000 | 0.000 | 0.000 | 0.000 | 0.000  | 0.000  | 0.000 | 0.282  | 0.00 | 0.00 | 0.00 | 0.00 |
| MI        | -0.406    | 0.523 | 0.229  | 0.313  | 0.407 |       | 0.000 | 0.001 | 0.000 | 0.000 | 0.018 | 0.000 | 0.000  | 0.013  | 0.000 | 0.000  | 0.00 | 0.00 | 0.00 | 0.00 |
| DI        | 0.115     | 0.618 | 0.066  | -0.019 | 0.117 | 0.951 |       | 0.193 | 0.000 | 0.000 | 0.821 | 0.032 | 0.126  | 0.755  | 0.018 | 0.000  | 0.00 | 0.00 | 1.00 | 0.00 |
| GP        | -0.983    | 0.203 | 0.943  | 0.968  | 0.988 | 0.459 | 0.182 |       | 0.000 | 0.000 | 0.000 | 0.000 | 0.000  | 0.000  | 0.000 | 0.106  | 0.00 | 0.00 | 0.00 | 0.00 |
| MAP       | -0.812    | 0.175 | 0.681  | 0.746  | 0.807 | 0.855 | 0.662 | 0.837 |       | 0.000 | 0.000 | 0.000 | 0.000  | 0.000  | 0.000 | 0.000  | 0.00 | 0.00 | 0.00 | 0.00 |
| SS%       | 0.859     | 0.151 | -0.738 | -0.795 | 0.851 | 0.782 | 0.558 | 0.862 | 0.982 |       | 0.000 | 0.000 | 0.000  | 0.000  | 0.000 | 0.000  | 0.00 | 0.00 | 0.00 | 0.00 |
| Tmax      | -0.991    | 0.343 | 0.982  | 0.991  | 0.984 | 0.324 | 0.032 | 0.971 | 0.756 | 0.810 |       | 0.000 | 0.000  | 0.000  | 0.000 | 0.702  | 0.00 | 0.00 | 0.00 | 0.00 |
| Tmin      | -0.976    | 0.086 | 0.912  | 0.945  | 0.979 | 0.567 | 0.295 | 0.980 | 0.899 | 0.930 | 0.953 |       | 0.000  | 0.000  | 0.000 | 0.016  | 0.00 | 0.00 | 0.00 | 0.00 |
| MTCO      | -0.991    | 0.172 | 0.947  | 0.972  | 0.994 | 0.494 | 0.213 | 0.990 | 0.861 | 0.897 | 0.975 | 0.995 |        | 0.000  | 0.000 | 0.074  | 0.00 | 0.00 | 0.00 | 0.00 |
| MTWA      | -0.997    | 0.333 | 0.988  | 0.997  | 0.995 | 0.338 | 0.044 | 0.979 | 0.766 | 0.816 | 0.995 | 0.960 | 0.982  |        | 0.000 | 0.637  | 0.00 | 0.00 | 0.00 | 0.00 |
| PDM       | -0.936    | 0.216 | 0.882  | 0.913  | 0.922 | 0.576 | 0.325 | 0.916 | 0.892 | 0.904 | 0.906 | 0.934 | 0.934  | 0.915  |       | 0.099  | 0.00 | 0.00 | 0.00 | 0.00 |
| PWM       | -0.127    | 0.732 | -0.052 | 0.031  | 0.150 | 0.880 | 0.913 | 0.225 | 0.616 | 0.526 | 0.054 | 0.329 | 0.247  | 0.066  | 0.229 |        | 0.00 | 0.00 | 3.00 | 0.00 |
| TAR       | 0.670     | 0.445 | -0.514 | -0.587 | 0.686 | 0.889 | 0.737 | 0.728 | 0.931 | 0.906 | 0.608 | 0.814 | -0.757 | -0.621 | 0.718 | -0.804 |      | 0.00 | 0.00 | 0.00 |

|            |       |       |        |        |       |       |       |       |       |       |       |       |        |        |       |        |      |       |      |
|------------|-------|-------|--------|--------|-------|-------|-------|-------|-------|-------|-------|-------|--------|--------|-------|--------|------|-------|------|
|            | -     | -     | -      | -      | -     | -     | -     | -     | -     | -     | -     | -     | -      | -      | -     | -      | 0.95 | 0.00  | 0.00 |
| <b>MDT</b> | 0.848 | 0.214 | -0.730 | -0.787 | 0.862 | 0.775 | 0.557 | 0.880 | 0.957 | 0.960 | 0.791 | 0.940 | -0.905 | -0.813 | 0.860 | -0.601 | 2    | 0     | 0    |
|            | -     | -     | -      | -      | -     | -     | -     | -     | -     | -     | -     | -     | -      | -      | -     | -      | 0.85 |       | 0.00 |
| <b>PS</b>  | 0.930 | 0.020 | -0.835 | -0.883 | 0.925 | 0.679 | 0.425 | 0.936 | 0.955 | 0.977 | 0.891 | 0.973 | -0.955 | -0.900 | 0.950 | -0.399 | 4    | 0.954 | 0    |
|            | -     | -     | -      | -      | -     | -     | -     | -     | -     | -     | -     | -     | -      | -      | -     | -      | 0.99 | 0.86  |      |
| <b>TS</b>  | 0.689 | 0.421 | -0.538 | -0.609 | 0.707 | 0.879 | 0.722 | 0.746 | 0.934 | 0.910 | 0.625 | 0.828 | -0.774 | -0.642 | 0.730 | -0.790 | 9    | 0.962 | 3    |

**Table S3.** Loading of environmental variables in PCA analysis

| <b>Environmental variables</b> | <b>PC 1</b>     | <b>PC 2</b>     |
|--------------------------------|-----------------|-----------------|
| GDD5                           | <b>0.24512</b>  | 0.092666        |
| GDD0                           | <b>0.24797</b>  | 0.12184         |
| MAT                            | <b>0.23895</b>  | 0.20233         |
| MI                             | <b>0.22042</b>  | -0.25906        |
| DI                             | -0.18591        | <b>0.35743</b>  |
| GP                             | <b>0.2395</b>   | 0.075439        |
| MAP                            | <b>0.25227</b>  | -0.06391        |
| SS%                            | -0.25033        | <b>0.009061</b> |
| Tmax                           | 0.22566         | <b>0.2734</b>   |
| Tmin                           | <b>0.25041</b>  | 0.10046         |
| MTCO                           | <b>0.24572</b>  | 0.15114         |
| MTWA                           | 0.2292          | <b>0.25813</b>  |
| PDM                            | <b>0.2317</b>   | 0.16169         |
| PWM                            | <b>0.17458</b>  | -0.41061        |
| TAR                            | -0.23921        | <b>0.19665</b>  |
| MDT                            | -0.2517         | <b>0.079393</b> |
| PS                             | -0.24993        | <b>-0.05837</b> |
| TS                             | -0.24039        | <b>0.18741</b>  |
| SR                             | <b>0.054668</b> | -0.52759        |
| Eigen value                    | 15.4319         | 2.76236         |
| % Variance                     | 81.221          | 14.539          |
| Significant                    | <b>0.0001</b>   | 0.05            |



**Table S4.** Percentage of coefficient of determination ( $R^2_{adj}$ , %) by the generalized linear models (GLMs) between species richness of gymnosperms and predictor variables sets representing each hypothesis set.  $p$ -value is the significance value of each model. Numbers in parentheses are the coefficient of respective variables.

| Environmental predictor sets | Variables                 | Coeff.  | Std. error | t      | F      | p                | $R^2_{adj}$ (%) |
|------------------------------|---------------------------|---------|------------|--------|--------|------------------|-----------------|
| Energy-Water                 | GDD <sub>5</sub>          | -42.920 | 18.877     | -2.274 | 5.169  | 0.028            | 10.1            |
|                              | GDD <sub>0</sub>          | -38.616 | 23.566     | -1.639 | 2.685  | 0.108            | 5.5             |
|                              | MAT                       | -0.048  | 0.080      | -0.594 | 0.352  | 0.556            | 0.8             |
|                              | MI                        | 0.001   | 0.000      | 3.726  | 13.880 | <b>0.001</b>     | 23.2            |
|                              | DI                        | -0.001  | 0.000      | -4.503 | 20.270 | <b>&gt;0.000</b> | 30.6            |
|                              | GP                        | -0.908  | 2.749      | -0.330 | 0.109  | 0.743            | 0.2             |
|                              | MAP                       | 2.282   | 1.443      | 1.582  | 2.502  | 0.121            | 5.2             |
|                              | SS%                       | -0.024  | 0.014      | -1.691 | 2.858  | 0.098            | 5.9             |
| Physical tolerance           | $T_{max}$                 | -0.095  | 0.071      | -1.349 | 1.820  | 0.184            | 3.8             |
|                              | $T_{min}$                 | 0.072   | 0.138      | 0.525  | 0.275  | 0.602            | 0.6             |
|                              | MTCO                      | -0.004  | 0.088      | -0.041 | 0.002  | 0.968            | 0.0             |
|                              | MTWA                      | -0.083  | 0.068      | -1.219 | 1.486  | 0.229            | 3.1             |
|                              | PDM                       | -0.011  | 0.016      | -0.692 | 0.479  | 0.492            | 1.0             |
|                              | PWM                       | 0.592   | 0.091      | 6.510  | 42.380 | <b>0.000</b>     | 48.0            |
| Climatic seasonality         | TAR                       | -0.080  | 0.020      | -3.884 | 15.090 | <b>0.000</b>     | 24.7            |
|                              | MDT                       | -0.014  | 0.006      | -2.440 | 5.954  | <b>0.019</b>     | 11.5            |
|                              | Precipitation Seasonality | -0.207  | 0.207      | -1.001 | 1.003  | 0.322            | 2.1             |
|                              | Temperature Seasonality   | -0.027  | 0.007      | -3.716 | 13.800 | <b>0.001</b>     | 23.1            |
