# Supplementary material for: Distribution Patterns of Gymnosperm Species along Elevations on the Qinghai–Tibet Plateau: Effects of Climatic Seasonality, Energy–Water, and Physical Tolerance Variables
Source: MDPI journal article supplement (doi:10.3390/plants12234066), 2023-12-04
Supplement: s1 [file s1]

# **Distribution patterns of gymnosperm species along elevations on the Qinghai–Tibet Plateau: Effects of climatic seasonality, energy–water, and physical tolerance variables**

**Muhammad Umair<sup>1,2\*</sup>, Xiaofei Hu<sup>1</sup>, Qi Cheng<sup>1</sup>, Shahzad Ali<sup>1</sup>, Jian Ni<sup>1\*</sup>**

<sup>1</sup>College of Life Sciences, Zhejiang Normal University, Jinhua 321004, China

<sup>2</sup>School of Agriculture and Biology, Shanghai Jiao Tong University, Shanghai  
200240, China

Correspondence: [umairm@zjnu.edu.cn](mailto:umairm@zjnu.edu.cn); [nijian@zjnu.edu.cn](mailto:nijian@zjnu.edu.cn)

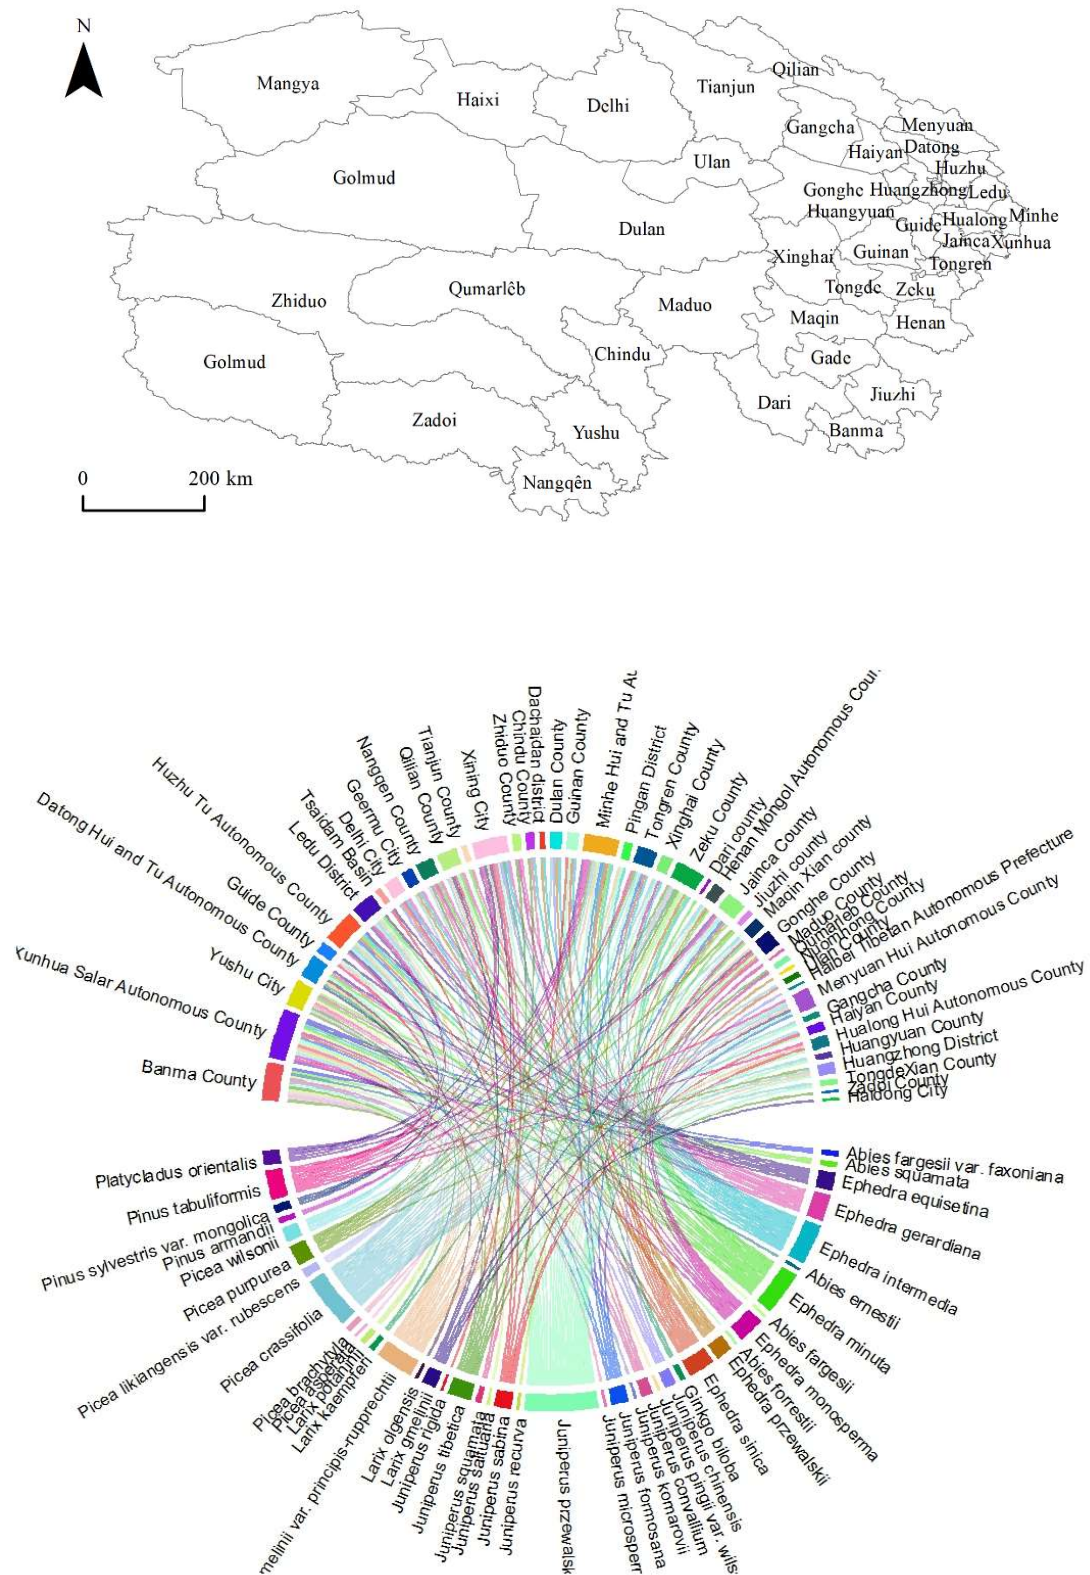

**Figure S1.** Regional distribution of gymnosperm species in the Qinghai-Tibet Plateau, China.

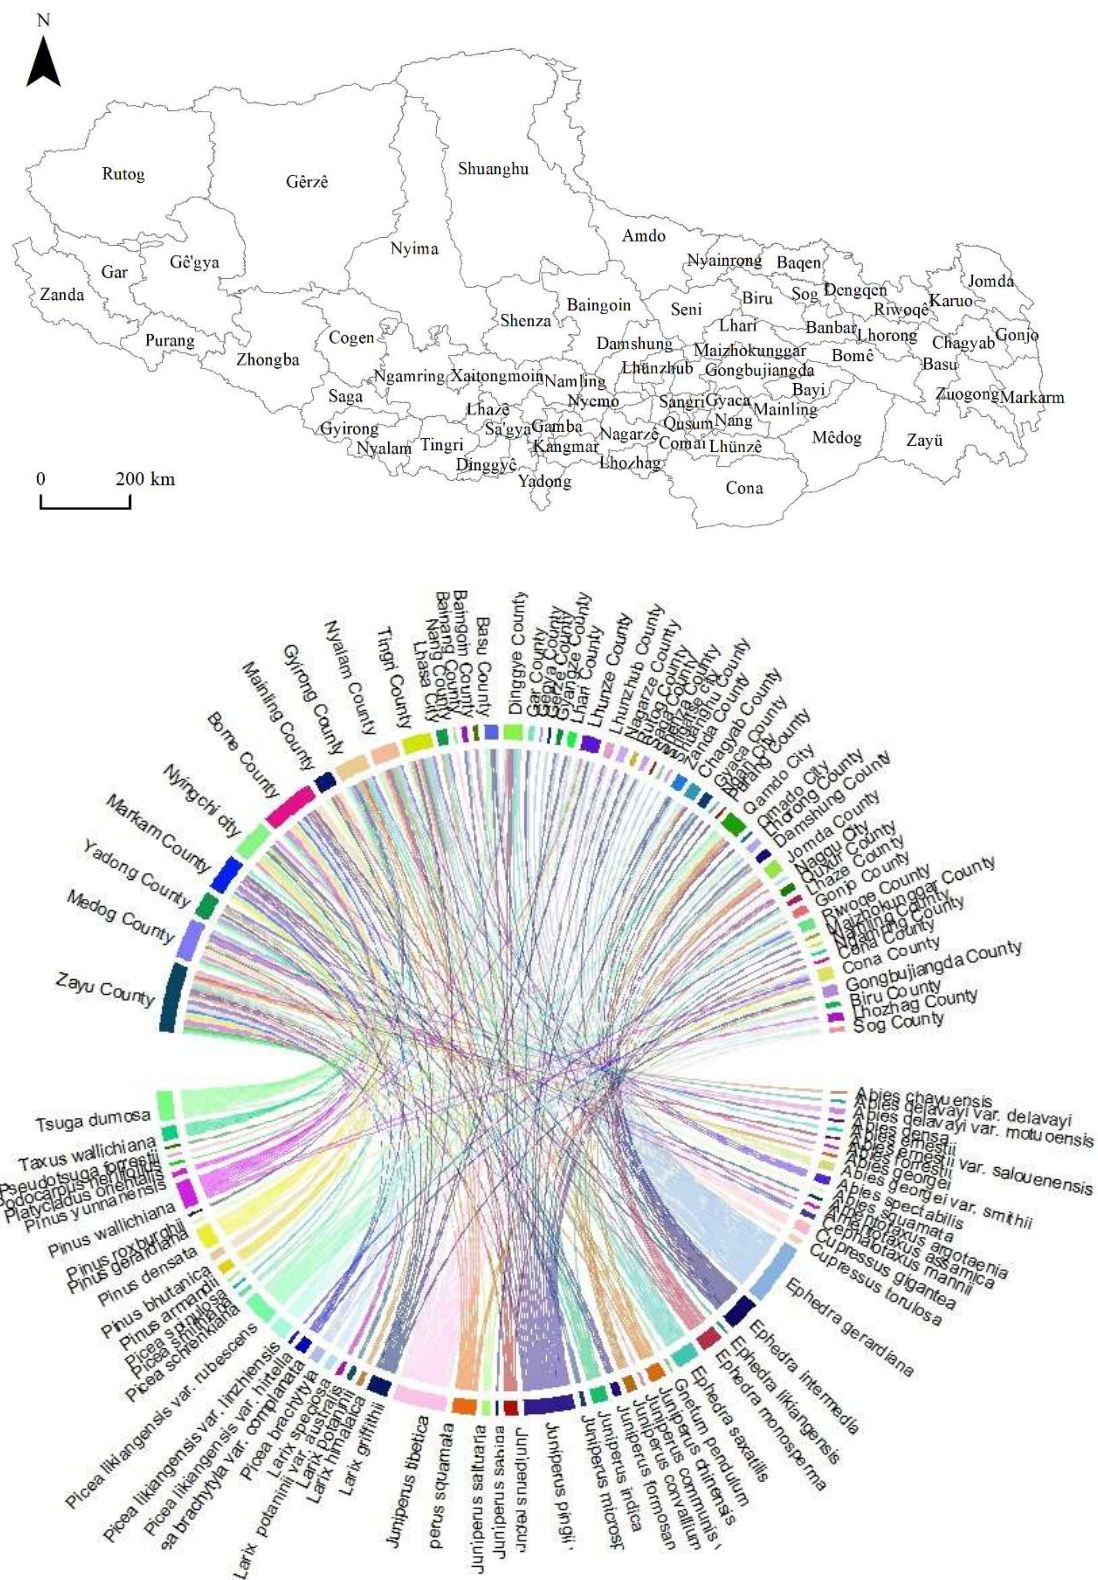

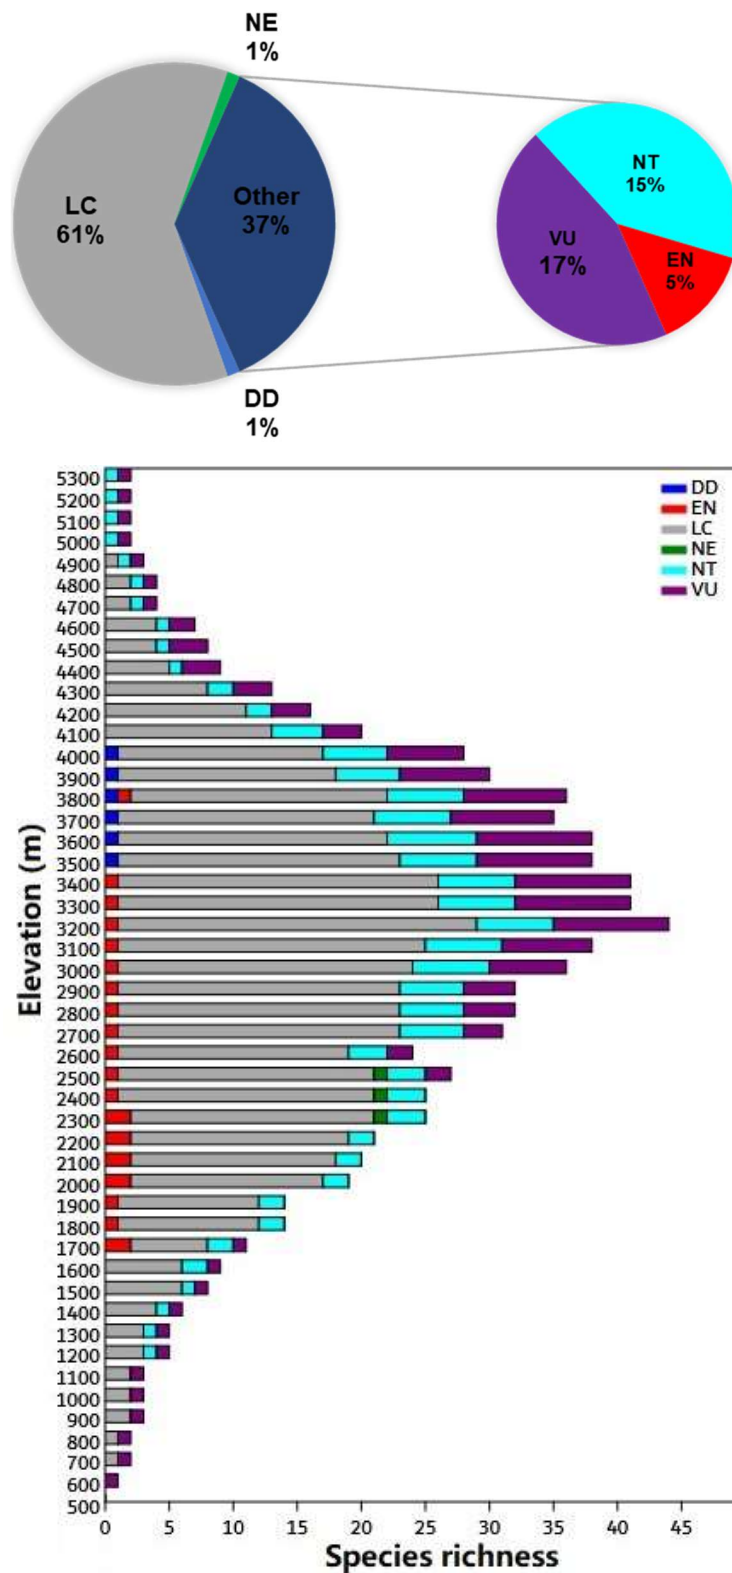

**Figure S3.** The conservation status of gymnosperm species along the elevations on the Qinghai–Tibetan Plateau, China.



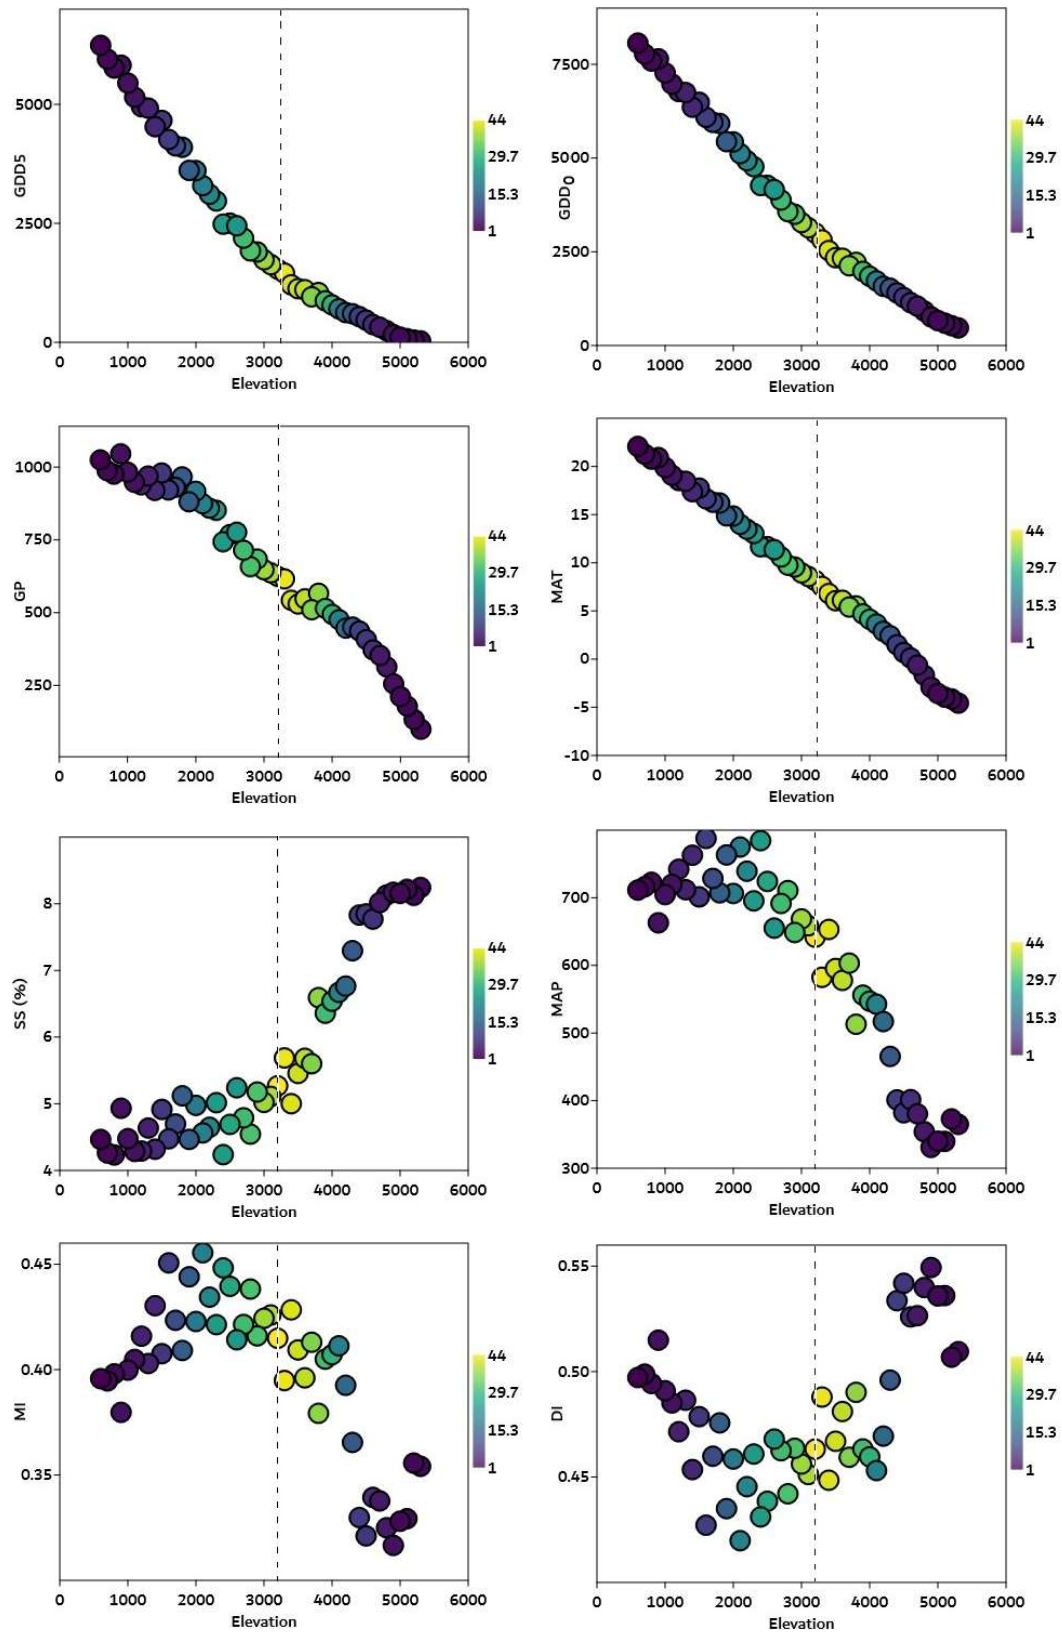

**Figure S4.** Scatter plots showing the relationship between elevation (m) and energy-water variables. The scale indicates gymnosperm richness along elevation gradients in the Qinghai–Tibet Plateau, China.

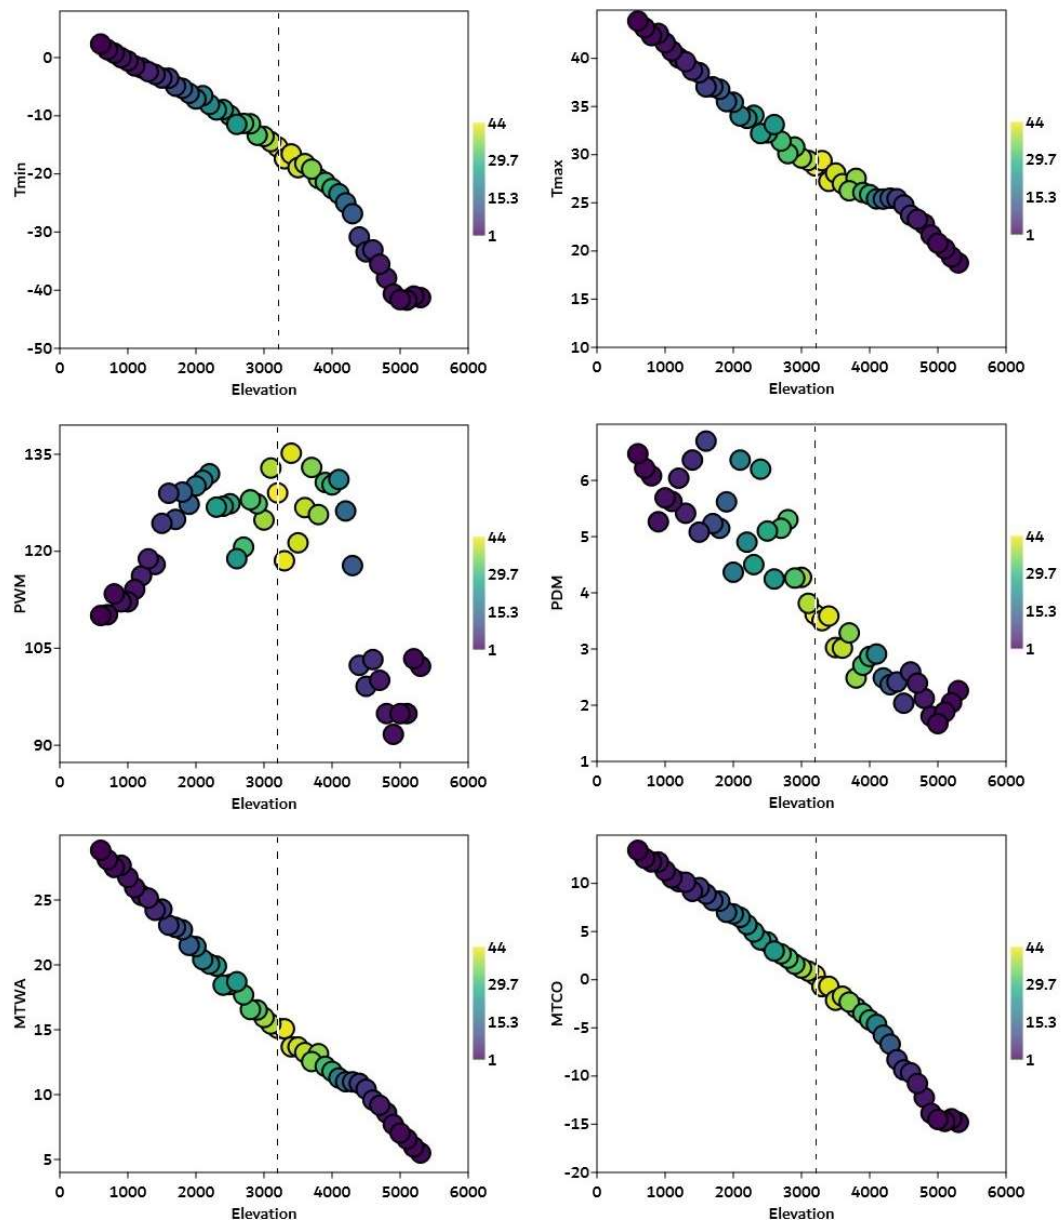

**Figure S5.** Scatter plots showing the relationship between elevation (m) and physical tolerance variables. The scale indicates gymnosperm richness along elevation gradients in the Qingha–Tibet Plateau, China.

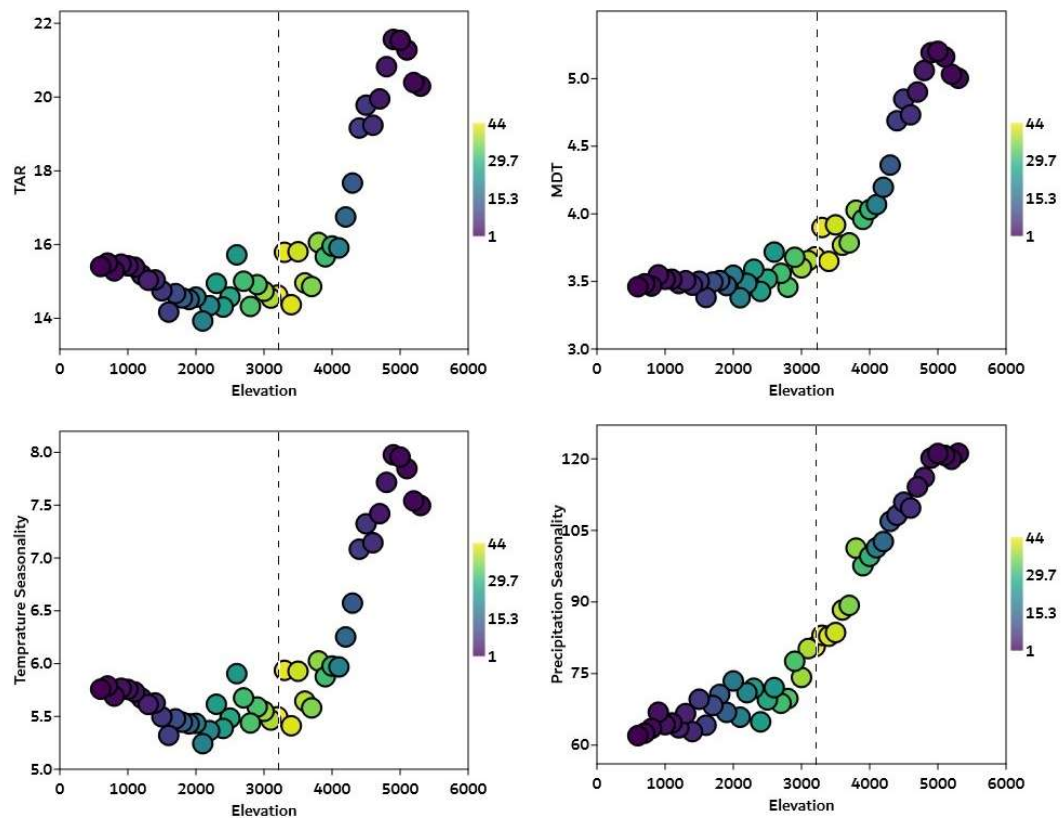

**Figure S6.** Scatter plots showing the relationship between elevation (m) and climatic seasonality variables. The scale indicates gymnosperm richness along elevation gradients in the Qinghai–Tibet Plateau, China.

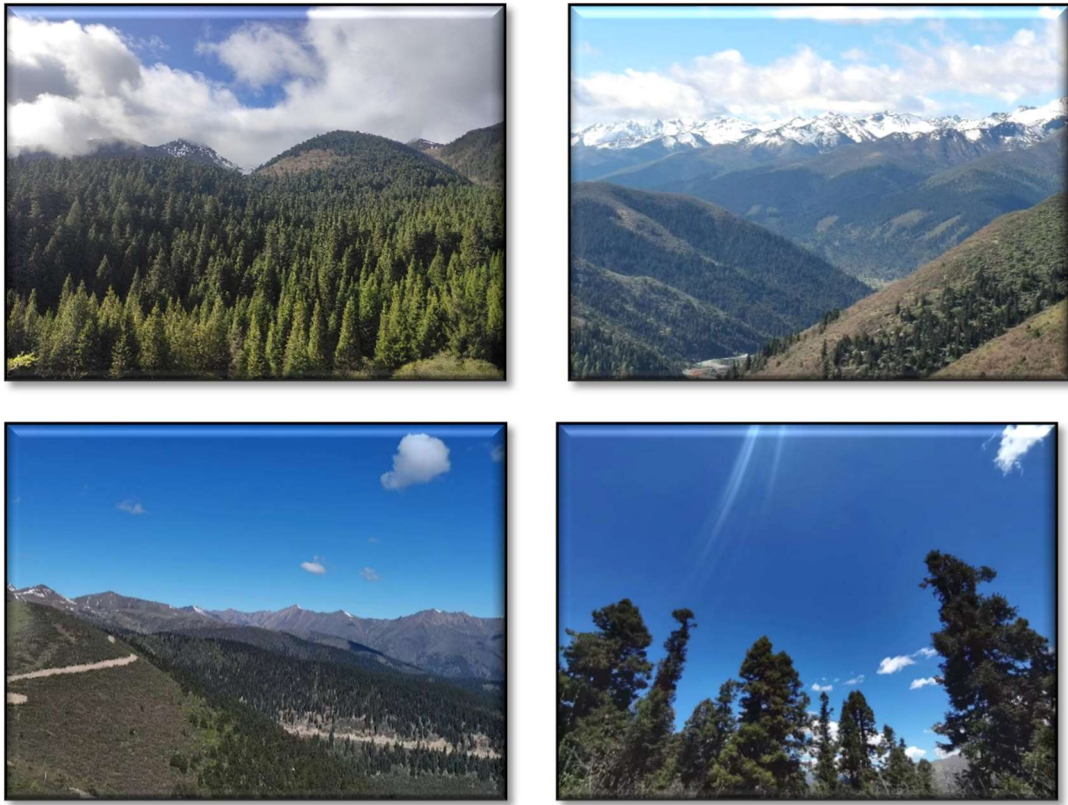

**Figure S7.** Spruce forest distribution in the QTP's sub-alpine zone (3250 m a.s.l.) between 32°30'-32°54' north latitude and 103°25'-104°45' east longitude.
